# Supplementary material
Source: PubMed Central journal article supplement (PMC4479152)
Supplement: NIHMS700602-supplement-01.pdf [file NIHMS700602-supplement-01.pdf]

## Supplemental Figures

DJR-1.1            2 A QKSALIIILAAEGAEEMEVIIITGDVLARGEIRVVYAGLDGAEPVKCARGAHIVPDVKLED

DJR-1.2            3 A QKSALILLPPEDAEEIEVIVTGDVLRGGLQVLYAG-SSTEPVKCAKGARIVPDVALKD

\*\*\*\*\* \* \* \*\*\* \*\* \*\*\*\*\* \*\* \* \*\*            \*\*\*\*\* \*\* \*\*\*\*\* \* \*

DJR-1.1            62 VETEKFDIVILPGGQPGSNTLAESLLVRDVLKSQVESGGLIGAICAAPIALLSHGKAEEL

DJR-1.2            62 VKNKTFDIIIPGG-PGCSKLAECPVIGELLKTQVKSGGLIGAICAGPTVLLAHGIVAER

\*        \*\*\* \* \*\*\* \*\*        \*\*\*            \*\* \*\* \*\*\*\*\* \*        \*\* \*\* \*\*

```

DJR-1.1      122 VTSHPSVKEKLEKGGYKYSERVVVSGKIITSRGPGTAFEFALKIVELLEGGKDKATSLIA
DJR-1.2      121 VTCHYTVKDKMTEGGYKYLDNVDVVISDRVITSKGPGTAFEFALKIVETLEGPEKTNSLLK
              ** *  ** *  ***** * ** *  *** ***** ** *  **
DJR-1.1      182 PMLL
DJR-1.2      181 PLCL
              *  *

```

Figure S1. The homology between DJR-1.1 and DJR-1.2.

Figure S1. The homology between DJR-1.1 and DJR-1.2. There is about 62.5% identity between these two proteins. \*, the same amino acid.
